# Supplementary figures and images for: Dietary fucoidan modulates the gut microbiota in mice by increasing the abundance ofLactobacillusandRuminococcaceae
Source: Royal Society of Chemistry journal article supplement (doi:10.1039/c6fo00309e), 2016-01-01

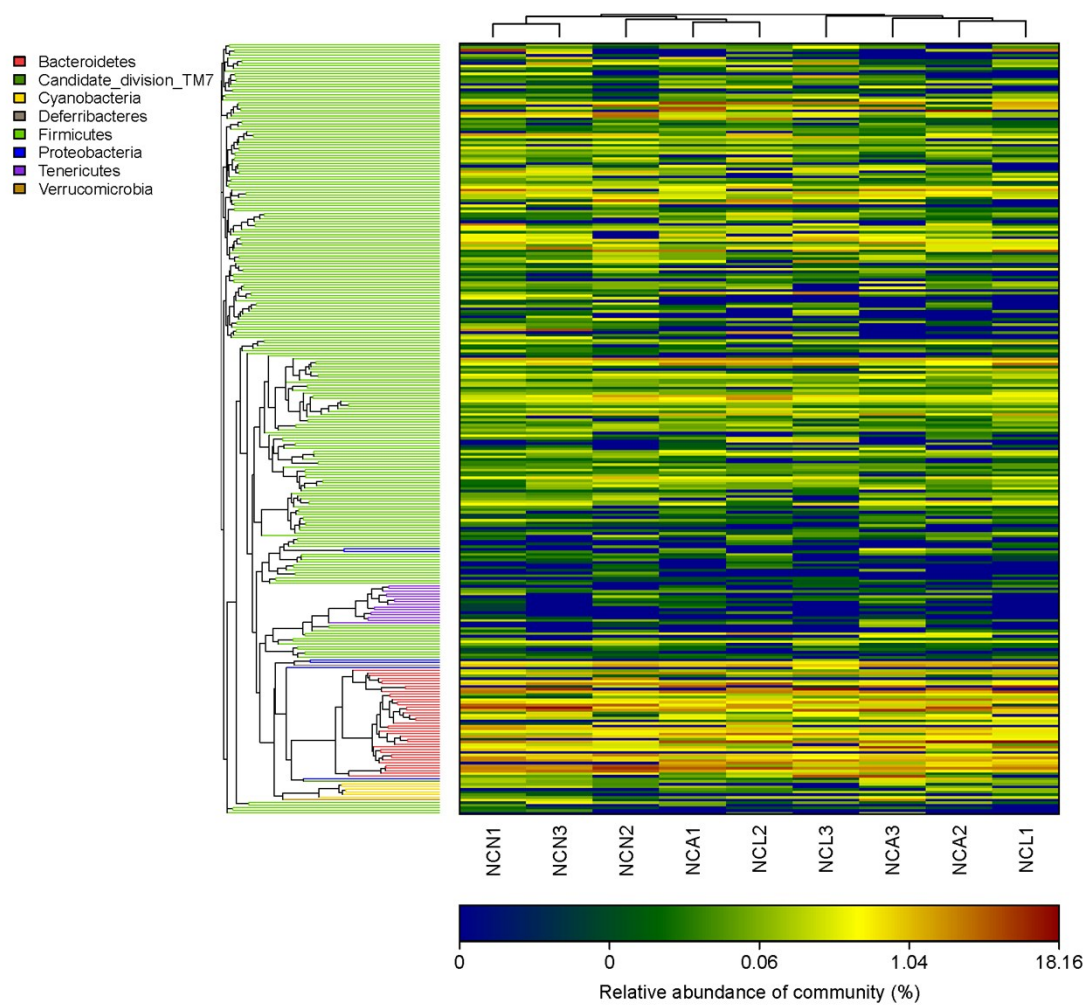

Figure S1 Heatmap indicating phylum-level changes among the NCN, NCL and NCA groups.

Supplement: c6fo00309e1.pdf [file c6fo00309e1.pdf]
